# Supplementary material
Source: publisher figshare collection journal article supplement (https://acs.figshare.com/ndownloader/files/12713738)
Supplement: Supplementary file 1 [file 12713738]

## Supporting Information for An Improved Process for Industrial Production of Isosorbide-5-mononitrate: Recycling of Wastes

Shi-Guo Zhu,<sup>1</sup> Jiang-Tao Yang,<sup>1</sup> Gui-Min Zhang,<sup>2</sup> Cheng-Fu Chen,<sup>2</sup> Fu-Li Zhang\*<sup>1, 3</sup>

<sup>1</sup>Collaborative Innovation Center of Yangtze River Delta Region Green Pharmaceuticals, Zhejiang University of Technology, Hangzhou 310014, P. R. China.

<sup>2</sup>Shandong New Time Pharmaceutical Co., Ltd., Linyi 273400, P. R. China.

<sup>3</sup>Shanghai Institute of Pharmaceutical Industry, Pudong, Shanghai 201203, P. R. China.

Corresponding Author: Fu-Li Zhang, Email: zhangfuli1@sinopharm.com

|                                                                             |    |
|-----------------------------------------------------------------------------|----|
| 1. Supplementary on the acetylated impurities in the direct nitration of IS | S2 |
| 2. The relevant GC chromatograms in the Table 2                             | S3 |
| 3. The relevant GC chromatograms in the Table 5                             | S3 |
| 4. The relevant HPLC chromatograms in the Table 4                           | S3 |
| 5. <sup>1</sup> H NMR, <sup>13</sup> C NMR, MS date of IS-5-MN              | S4 |
| 6. <sup>1</sup> H NMR, <sup>13</sup> C NMR, MS date of ISDN                 | S5 |
| 7. <sup>1</sup> H NMR, <sup>13</sup> C NMR, MS date of IS                   | S6 |

# 1. Supplementary on the acetylated impurities in the direct nitration of IS.

During the process of direct nitration of IS (**Scheme S1**), series of acetylated side-products including isosorbide-2-acetate (IS-2-Ac), isosorbide-5-acetate (IS-5-Ac), isosorbide-2,5-diacetate (IS-2,5-DAc), isosorbide-2-acetate-5-nitrate (IS-2-Ac-5-MN), and isosorbide-5-acetate-2-nitrate (IS-5-Ac-2-MN) were detected by HPLC (**Figure S1**). However, the accumulation of acetylated side-products were much lower than nitration, where the total amount of acetylated side products was only 3% at the end of nitration reaction. And during the process of neutralization, IS-2-Ac, IS-5-Ac and IS-2,5-DAc were easily hydrolyzed by sodium hydroxide solution to form IS. IS-2-Ac-5-MN and IS-5-Ac-2-MN were hydrolyzed to give IS-5-MN and IS-2-MN respectively. Therefore, the main side-products in the direct nitration were IS-2-MN and ISDN.

## **Scheme S1.** Direct nitration of IS.

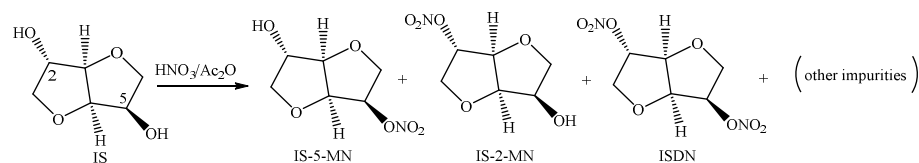

other impurities including:

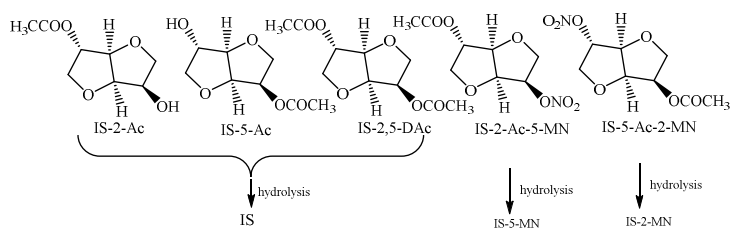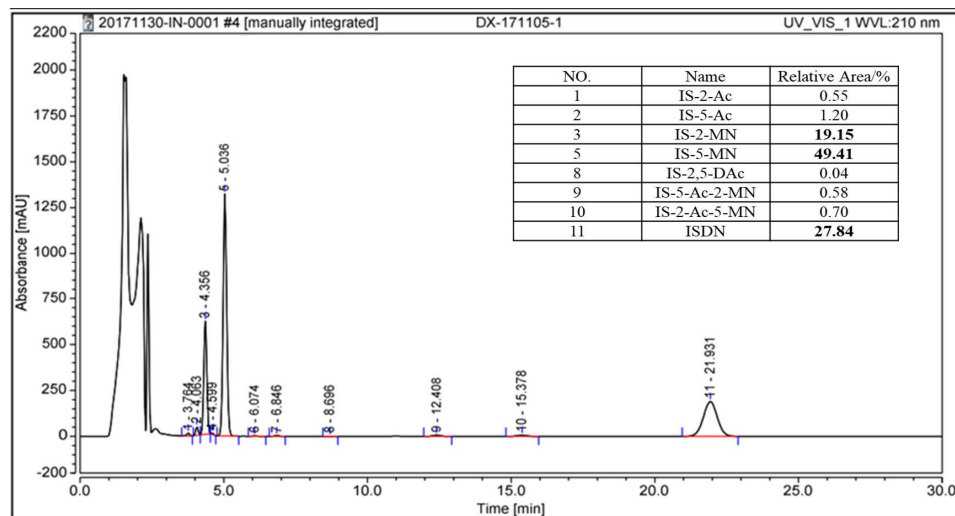

**Figure S1.** HPLC chromatogram of the direct nitration of IS.

2. The relevant GC chromatograms in the **Table 2**.

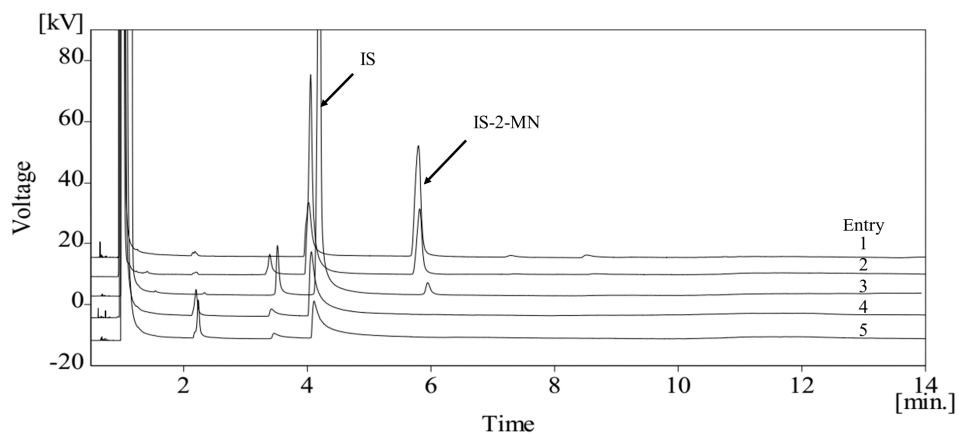

3. The relevant GC chromatograms in the **Table 5**.

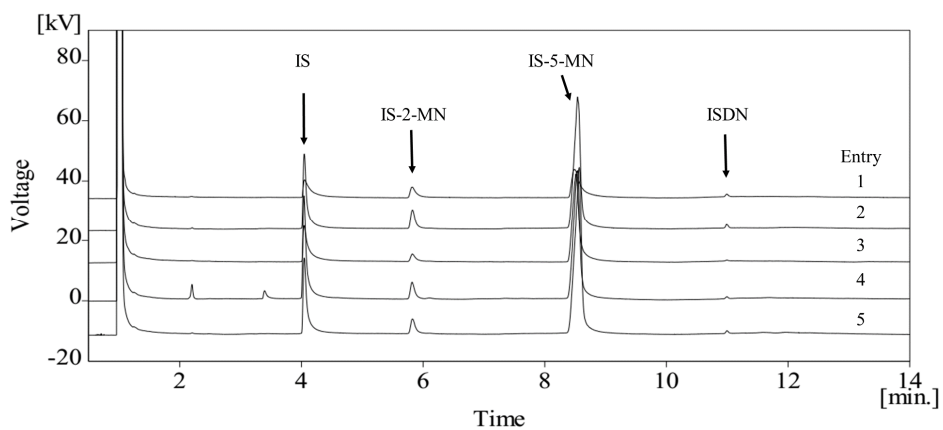

4. The relevant HPLC chromatograms in the **Table 4**.

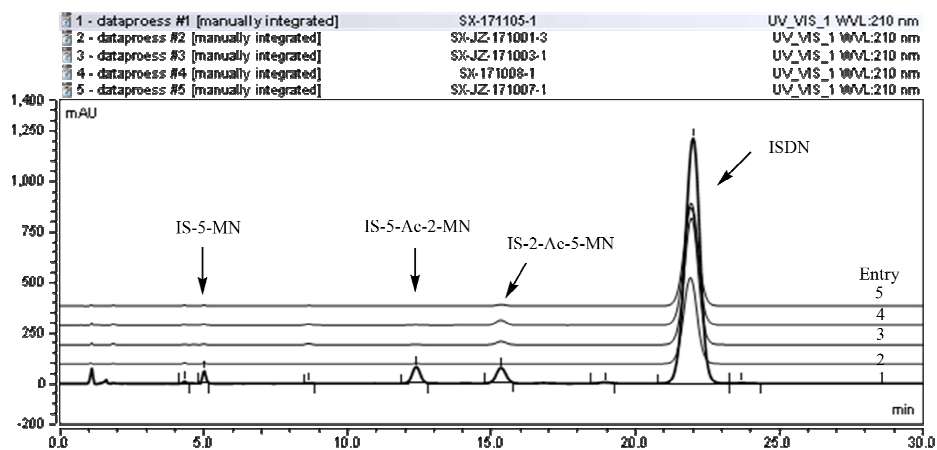

## 5. $^1\text{H}$ NMR, $^{13}\text{C}$ NMR, MS date of IS-5-MN

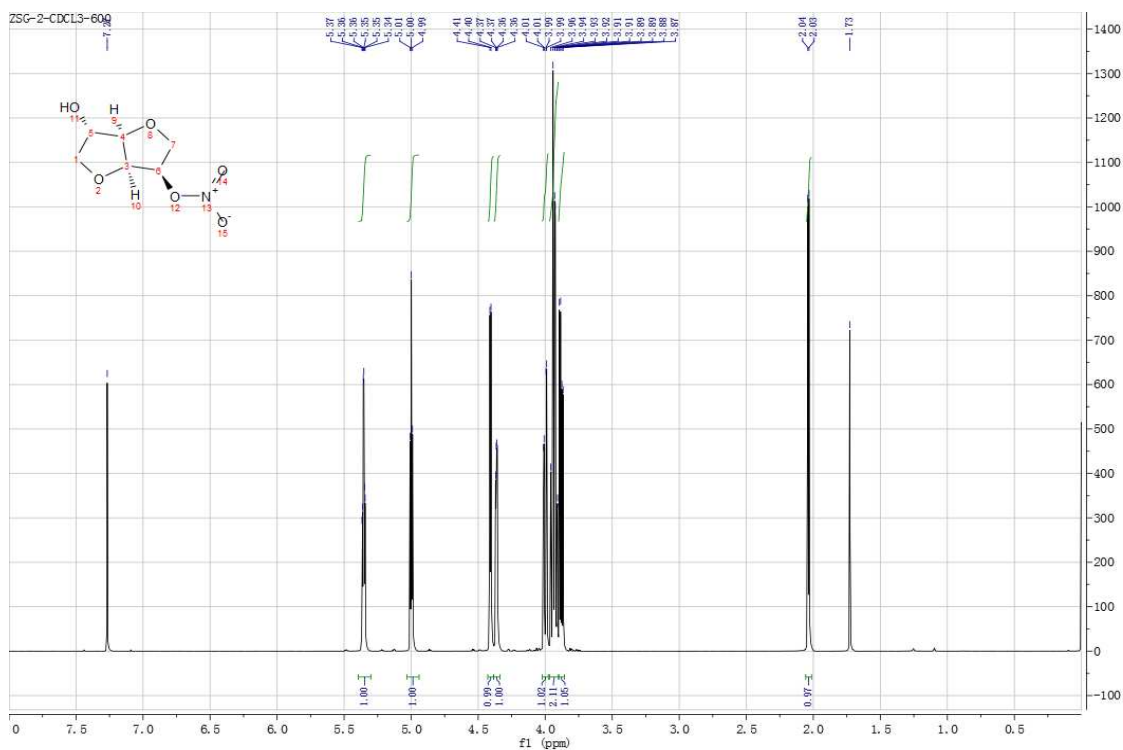<sup>1</sup>H NMR spectrum of IS-5-MN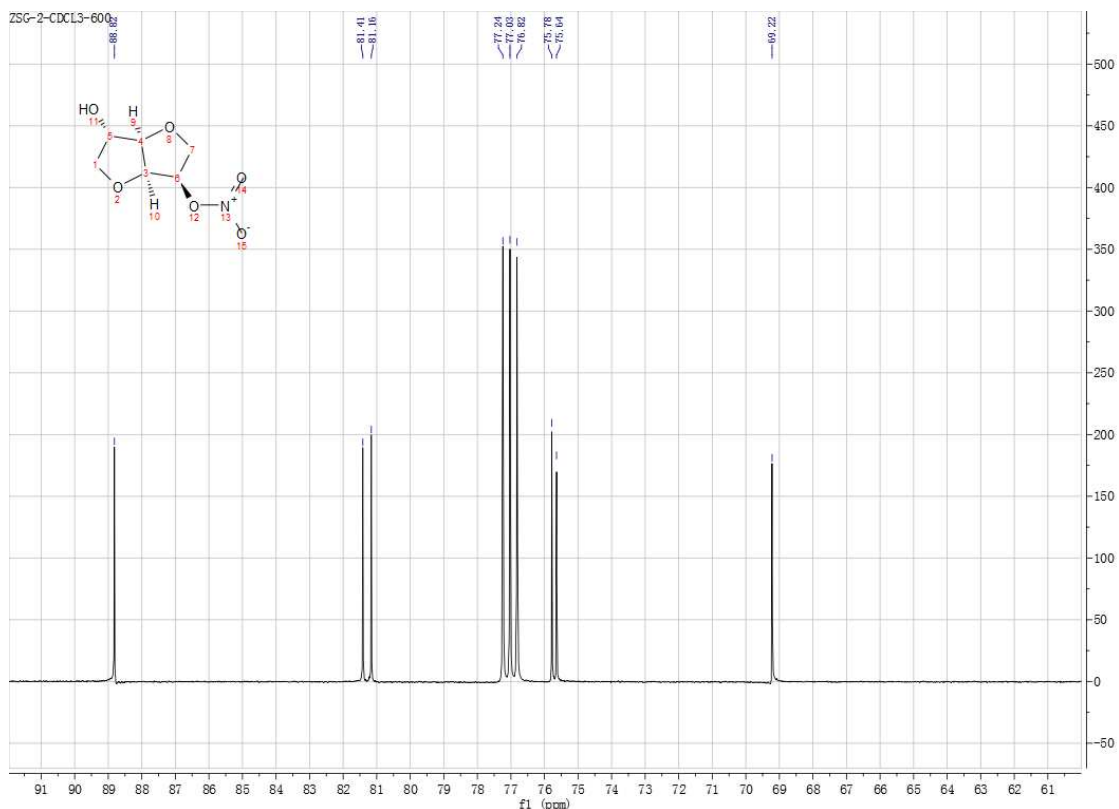

$^{13}\text{C}$  NMR spectrum of IS-5-MN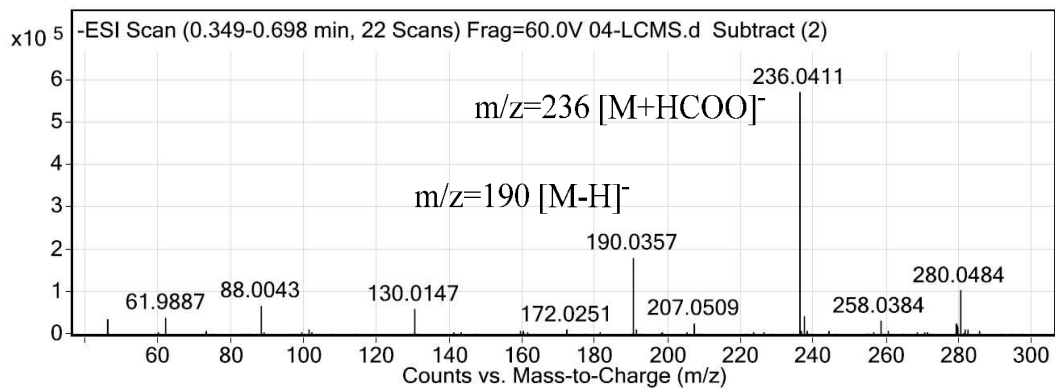

MS spectrum of IS-5-MN

## 6. $^1\text{H}$ NMR, $^{13}\text{C}$ NMR, MS date of ISDN

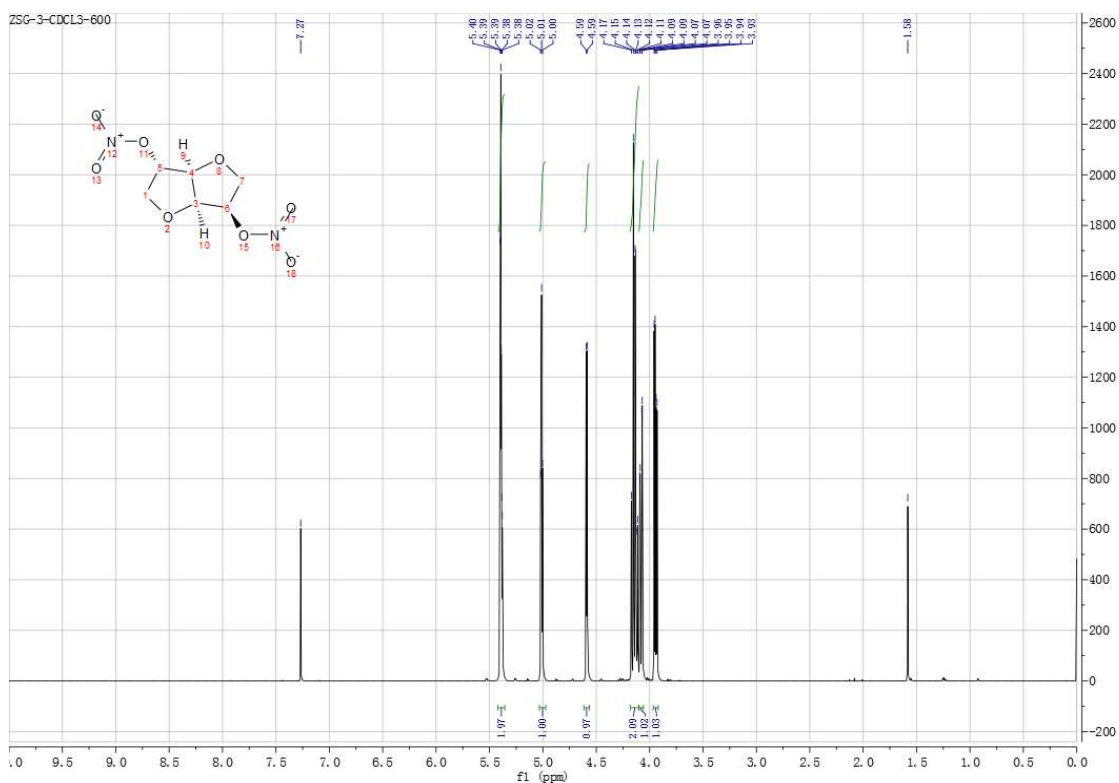<sup>1</sup>H NMR spectrum of ISDN

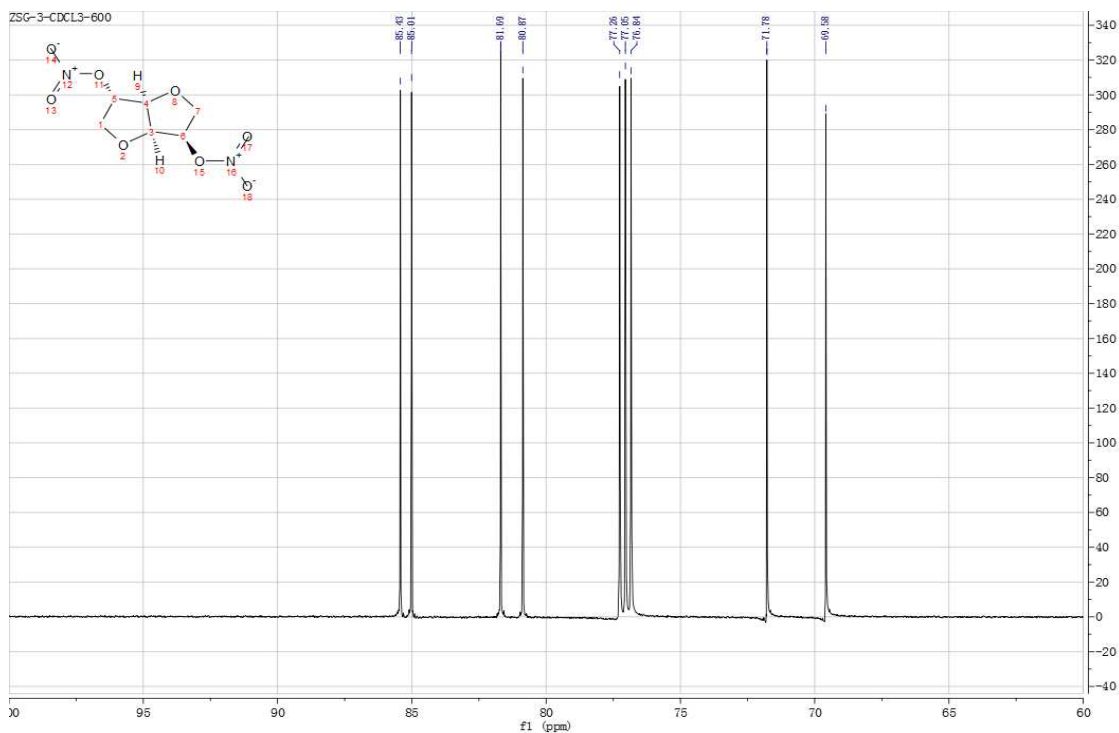

$^{13}\text{C}$  NMR spectrum of ISDN

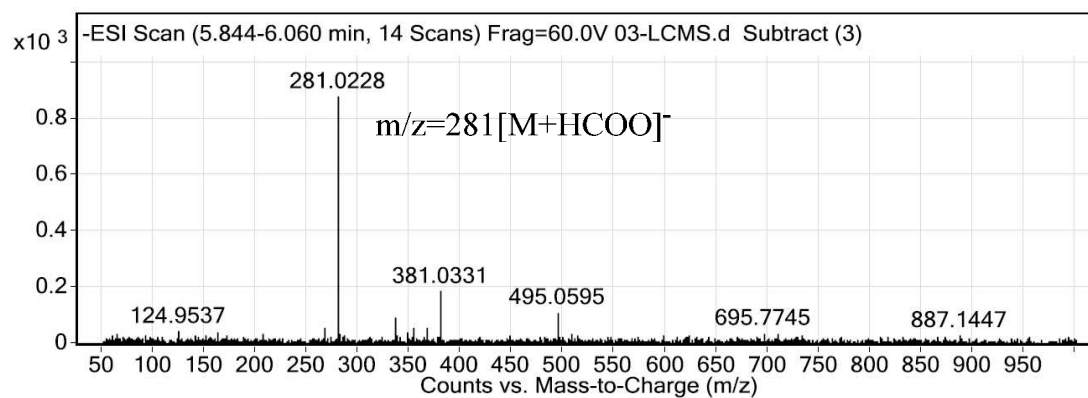

MS spectrum of ISDN

7.  $^1\text{H}$  NMR,  $^{13}\text{C}$  NMR, MS date of IS

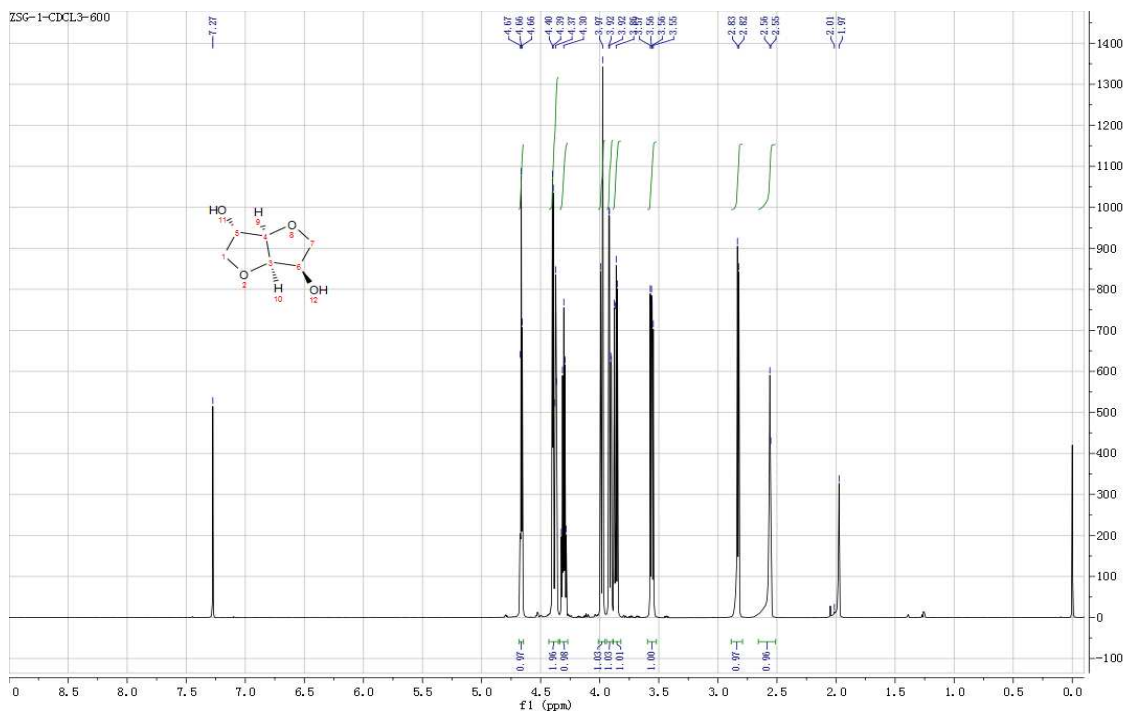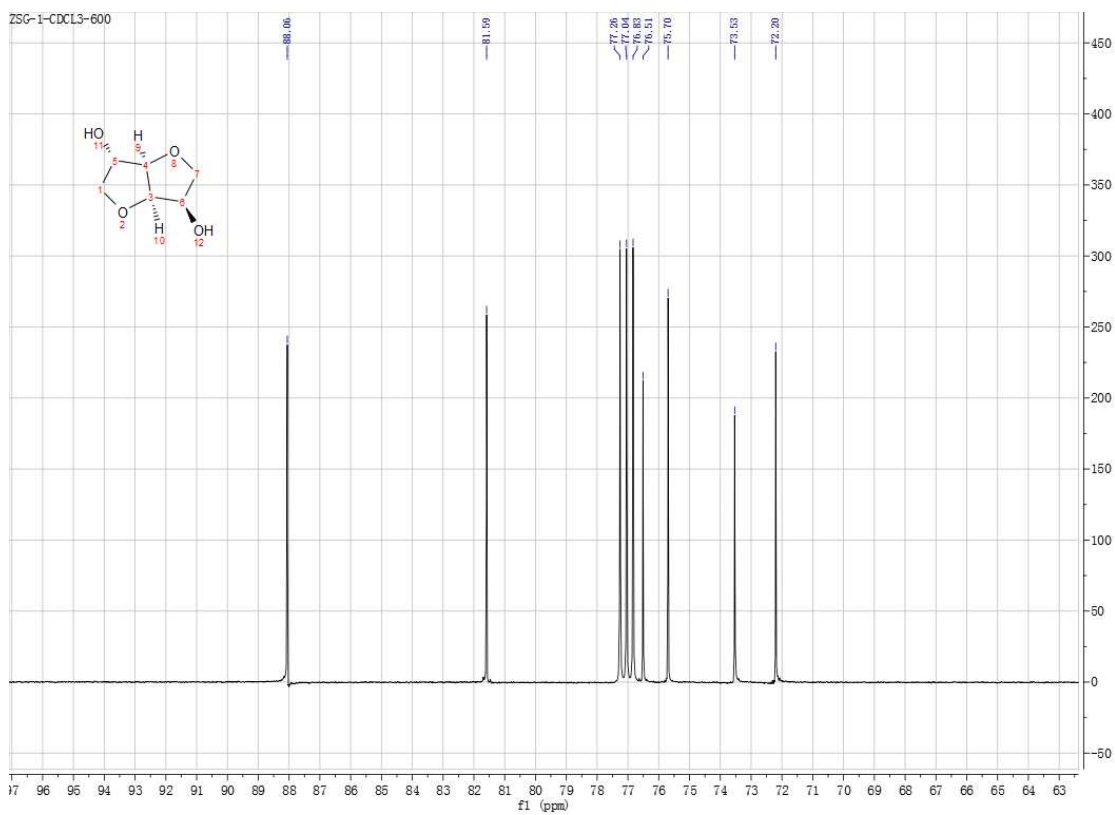

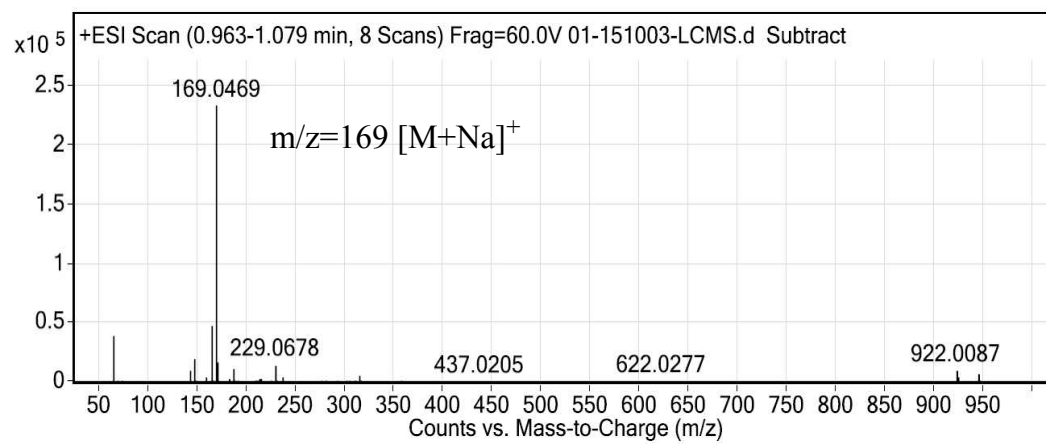

MS spectrum of IS
